# Supplementary material for: Ginseng-derived nanoparticles reprogram macrophages to regulate arginase-1 release for ameliorating T cell exhaustion in tumor microenvironment
Source: PubMed Central journal article supplement (PMC10683135; doi:10.1186/s13046-023-02888-7), 2023-11-28
Supplement: 13046_2023_2888_MOESM2_ESM.pdf [file 13046_2023_2888_MOESM2_ESM.pdf]

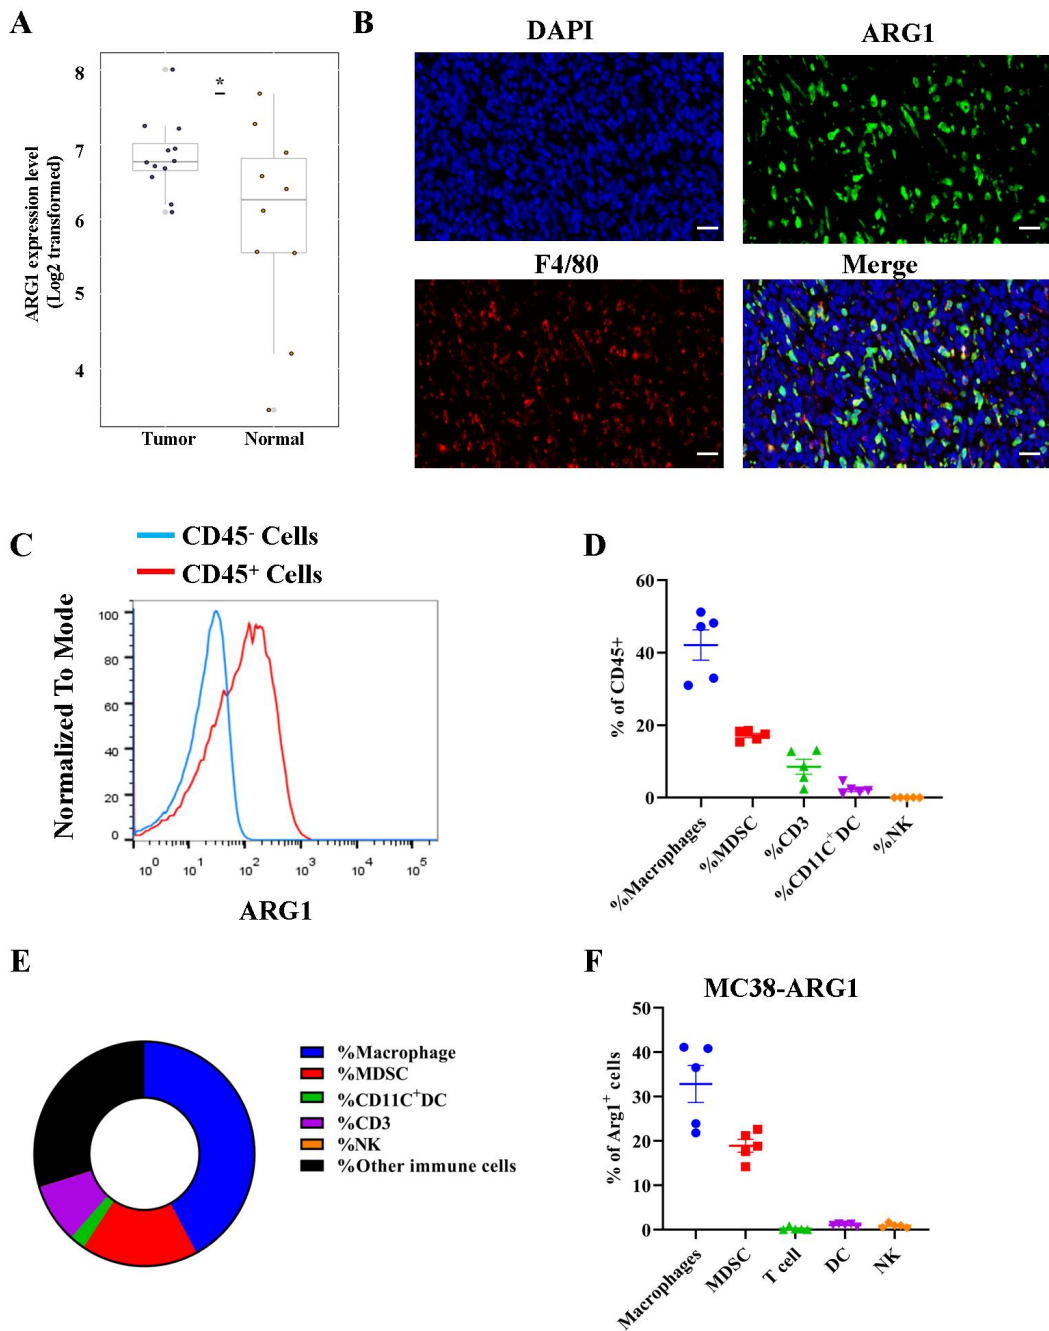

Figure. S1. ARG1 was mainly derived from tumor-associated macrophages. **a** The expression of ARG1 in colorectal cancer patients was analyzed using the GSE4107 dataset. **b** Arginase1<sup>+</sup> cells, macrophages (F4/80<sup>+</sup>) were detected in fixed colon tumor serial sections using immunofluorescence. Bar=20  $\mu$ m. **c** ARG1 expression in tumor cells (CD45<sup>-</sup> cells) and immune cells (CD45<sup>+</sup> cells) determined by flow cytometry. Orange represents isotype control, blue reflects ARG1 expression of CD45<sup>-</sup> cells, and red reflects ARG1 expression of CD45<sup>+</sup> cells. **d** Frequency

of main immune cells infiltrated in MC38 tumor. **e** Pie chart of the proportion of Macrophages, MDSC, DCs cells, T cells, NK cells, and other immune cells in mouse MC38 tumor environment. **f** The proportion of ARG1 expression in the main immune cell.

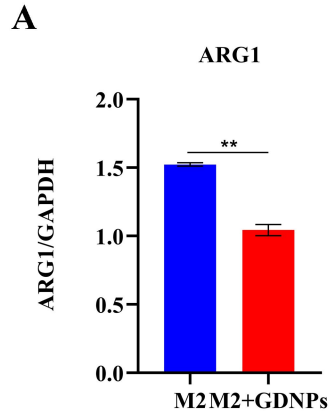

Figure. S2. GDNP decreased ARG1 expression in M2-like macrophages. **a** ARG1/GAPDH ratios.

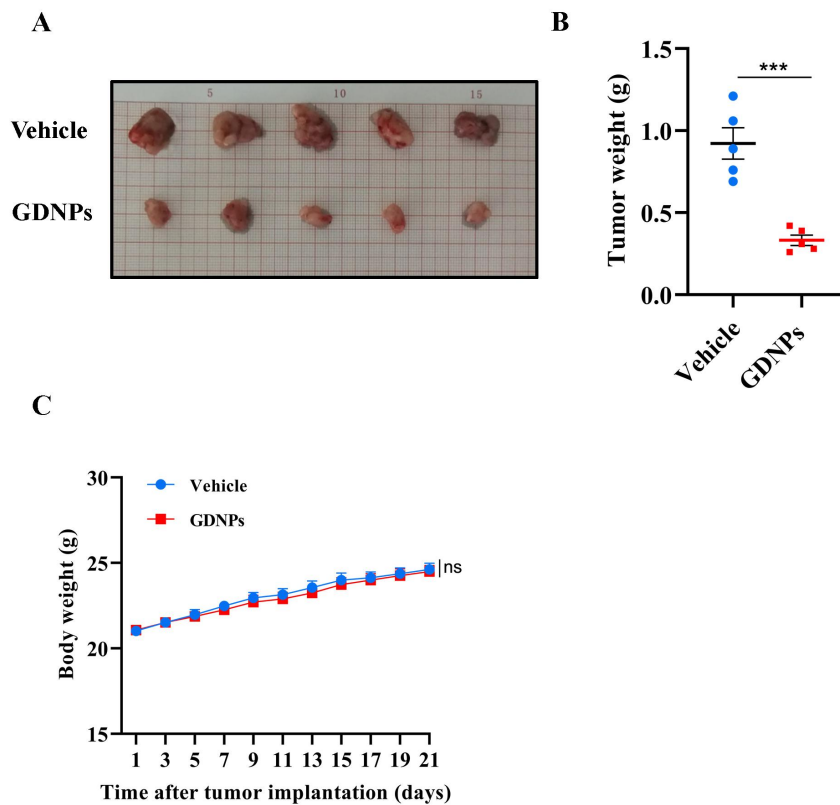

Figure. S3. GDNP could effectively inhibit the growth of MC38 colon tumor in mice. **a** The tumor size of Vehicle and GDNP group was photographed. **b** Tumor weights of two groups. **c** Body weights of two groups. All results represent the mean± SEM (n=5). Two-way ANOVA (c)

and Student's t test (b) were used to compare results of different experimental groups for statistically significant difference (\*\* $P < 0.001$ ).

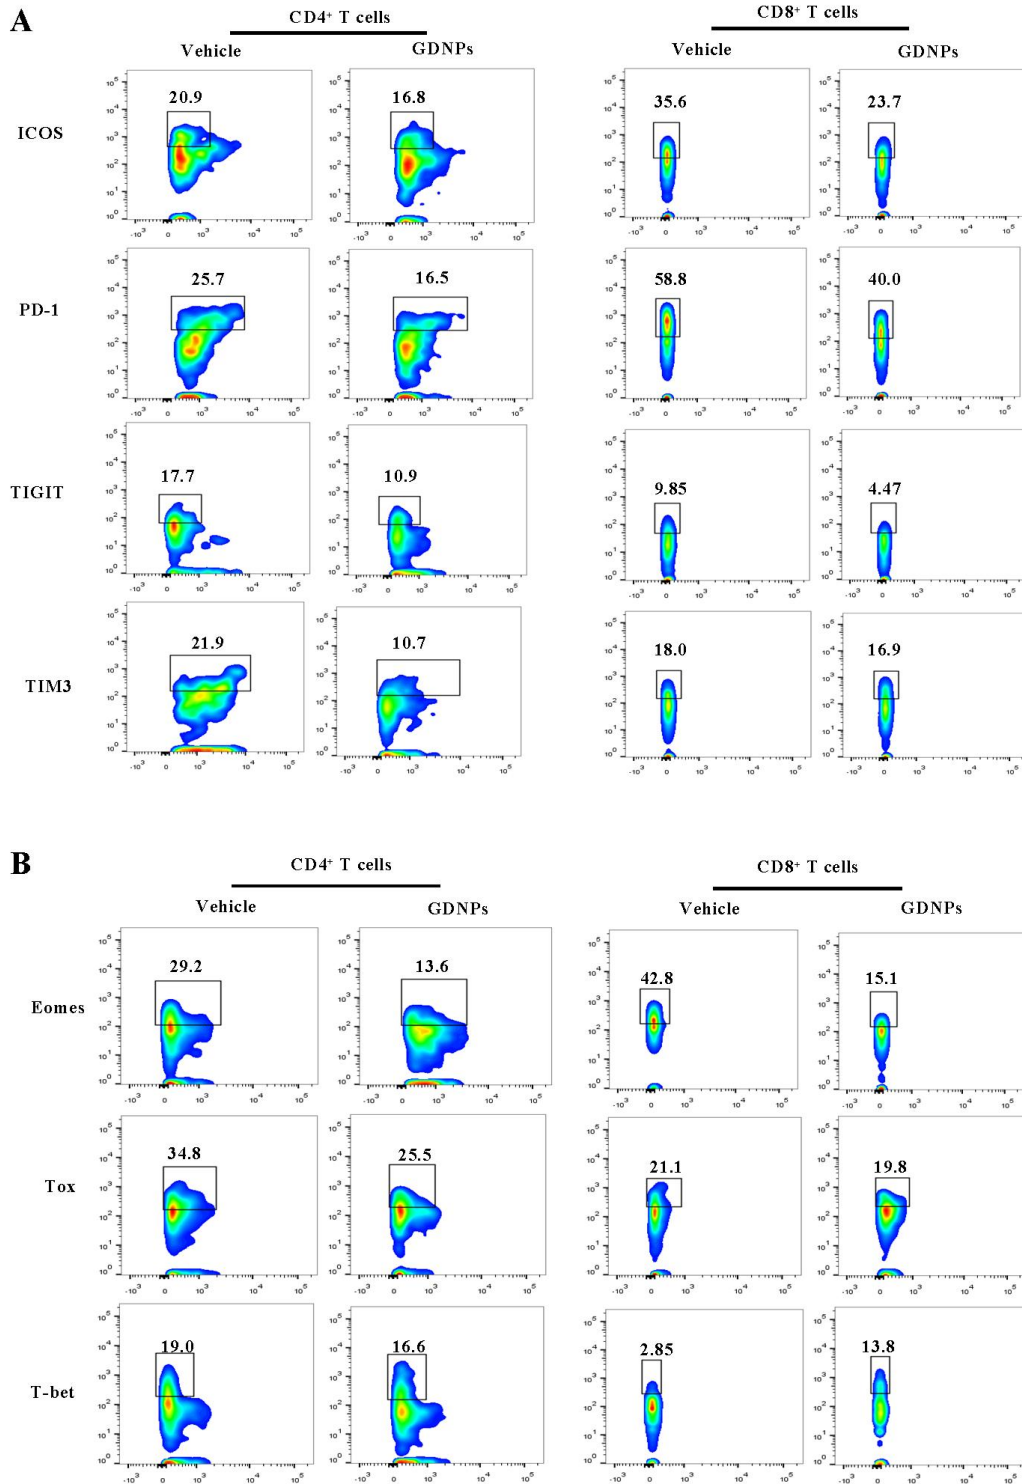

Figure. S4. GDNPs could regulate the expression of immune checkpoints and transcription factors.

a Representative histograms of ICOS, PD-1, TIGIT, TIM3 on CD4<sup>+</sup> and CD8<sup>+</sup> T cells in M2,

M2+GDNPs, M2+nor-NOHA and M2+L-Arg groups. **b** Representative histograms of Emoos, Tox, and T-bet in CD4<sup>+</sup> and CD8<sup>+</sup> T cells in M2, M2+ GDNPs, M2+ nor-NOHA and M2+ L-Arg groups. The results represent three independent experiments as the mean  $\pm$  SEM.

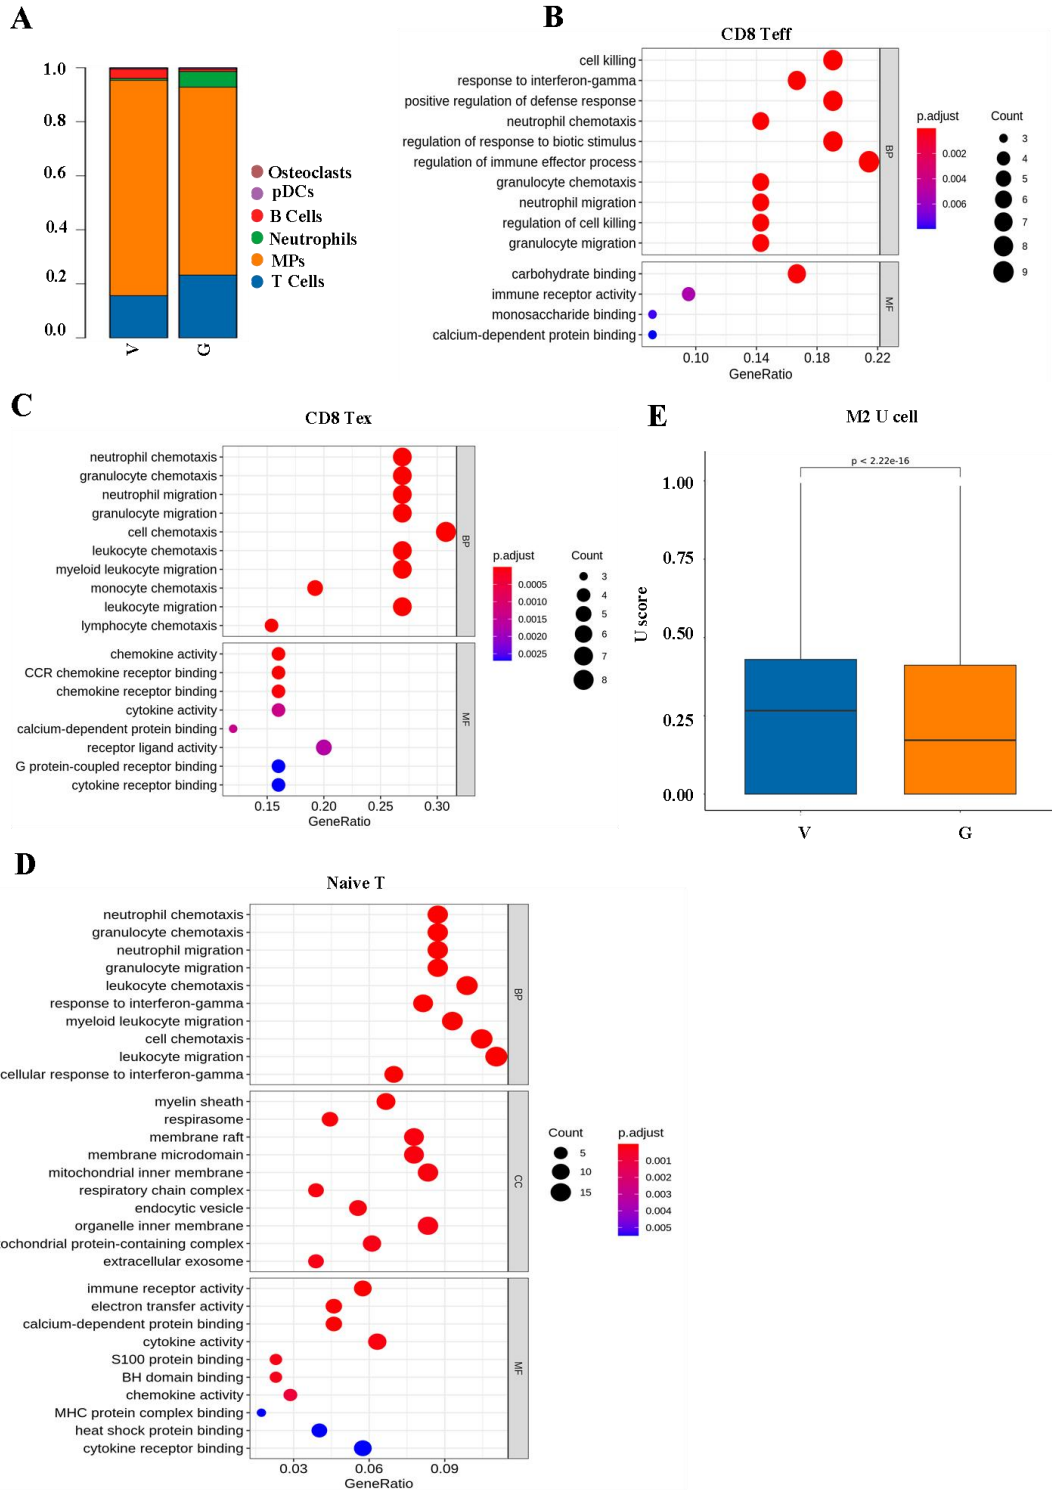

Figure. S5. GDNPs promoted the immune effector function of CD8 Teff. **a** The proportion of immune cells in MC38 colon cancer of mice was analyzed by single cell sequencing. **b** GO enrichment analysis was performed in CD8Teff (G VS V). **c** GO enrichment analysis was performed in CD8 Tex (G VS V). **d** GO enrichment analysis was performed in naive T (G VS V). **e** Ucell score was performed for gene sets with M2 polarization characteristics in macrophages. Wilcox (e) was used to compare results of different experimental groups for statistically significant difference (\*\*\*\* $P < 0.0001$ ).

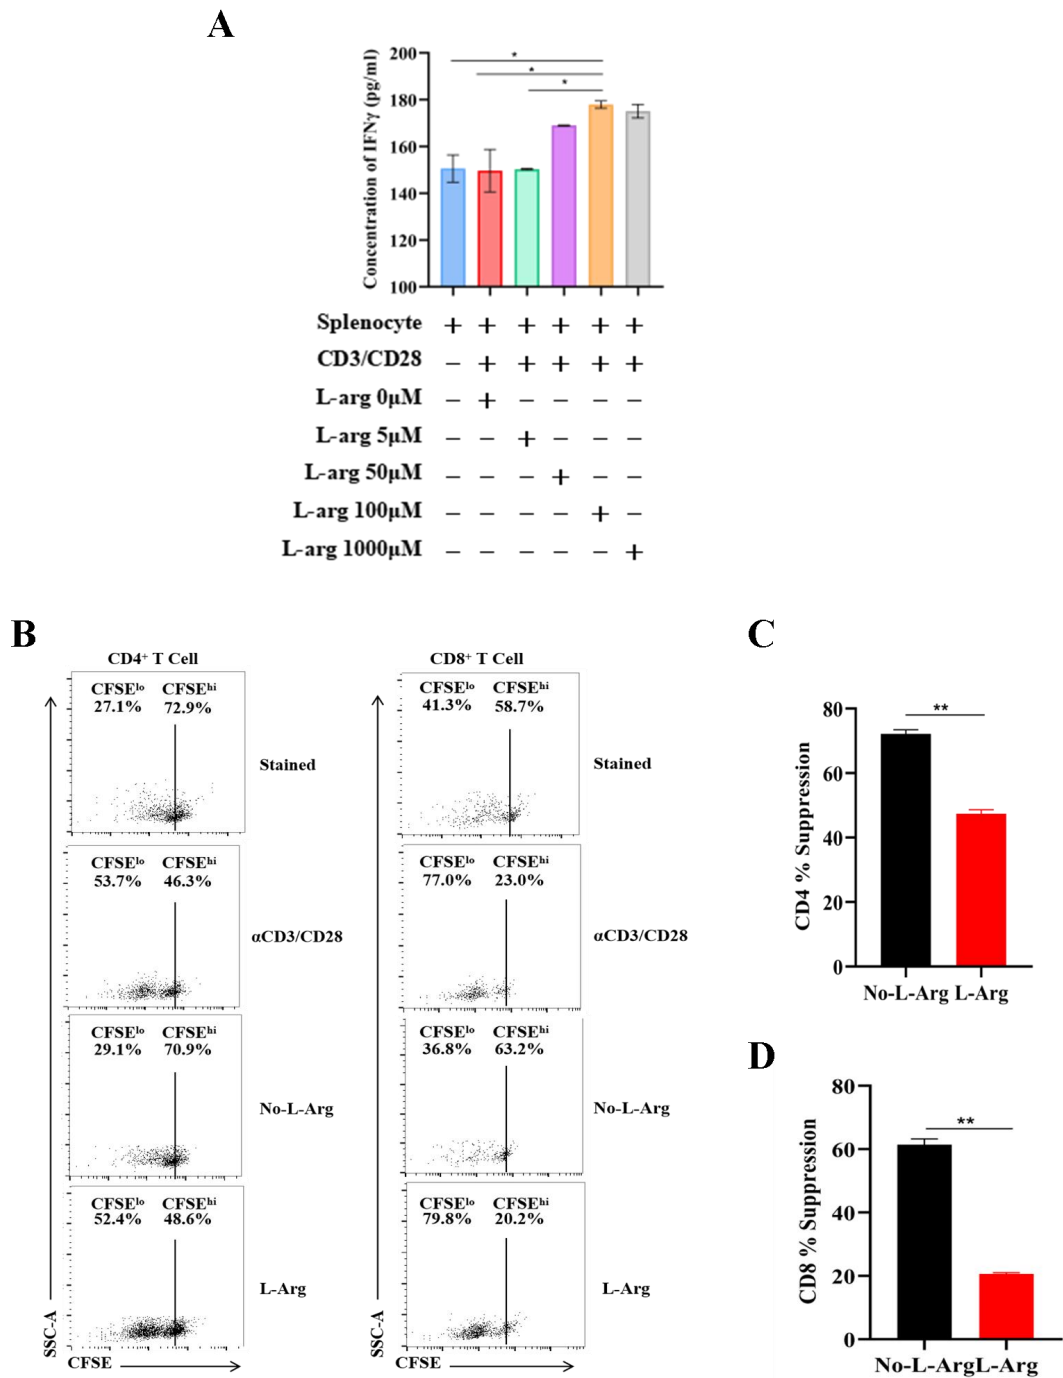

Figure. S6. L-Arginine promoted T cell activation and proliferation. **a** L-Arginine depletion prevented IFN- $\gamma$  secretion by splenocytes. Splenocytes were activated with  $\alpha$ CD3/CD28 in the presence of media with L-Arginine levels of 0, 5, 50, 100, 1000  $\mu$ M. After 48 h, IFN- $\gamma$  was determined by ELISA in the culture supernatants. **b, c, d** T cells proliferation assay. Splenocytes were cultured in medium with and without L-Arginine. The proliferation of CD4<sup>+</sup> and CD8<sup>+</sup> T cells was detected by Flow cytometry. The results represent three independent experiments as the

mean  $\pm$  SEM. Student's t test (a, c, d) were used to compare results of different experimental groups for statistically significant difference (\* $P < 0.05$ , \*\* $P < 0.01$ ).

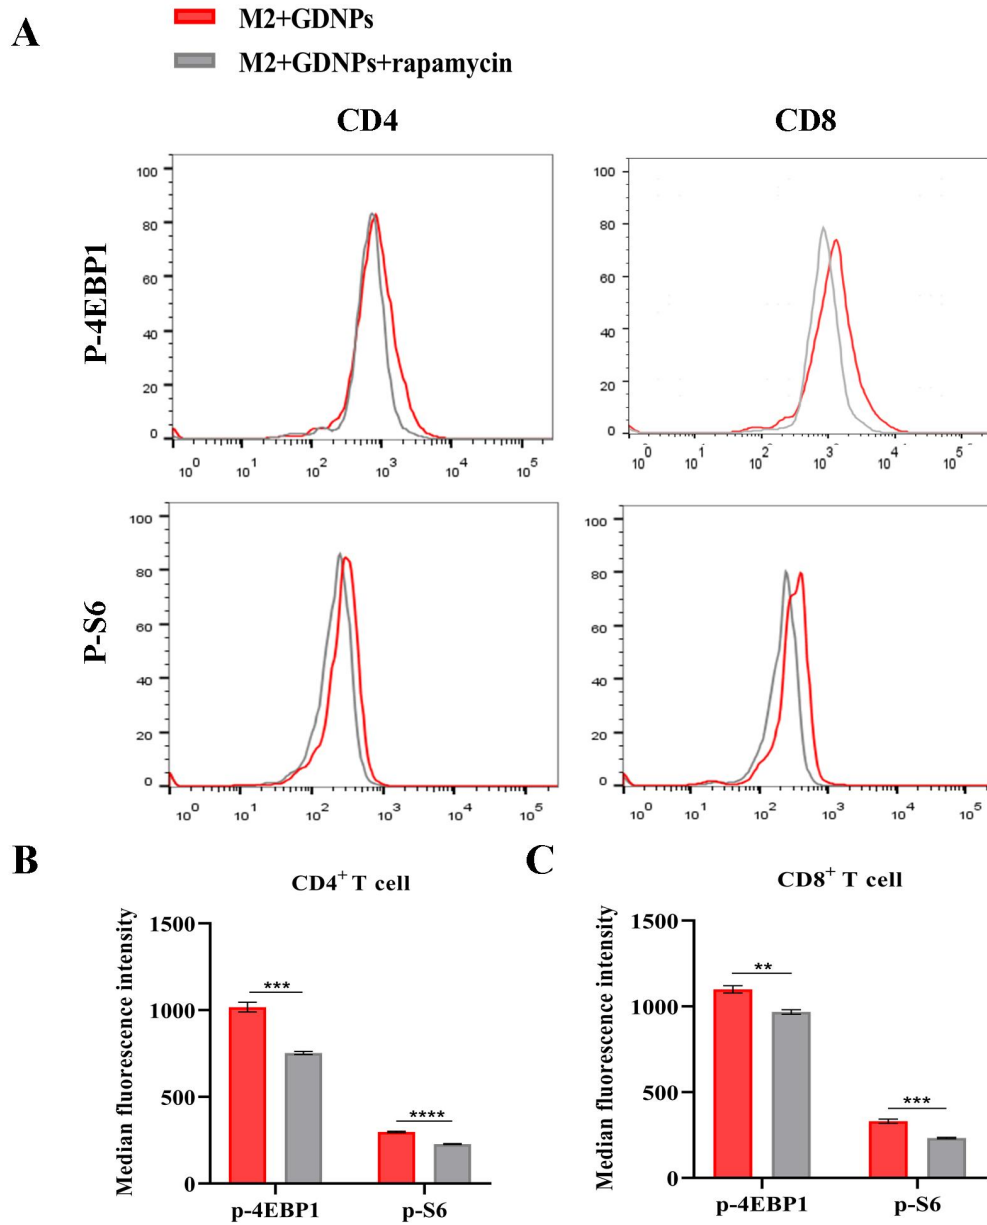

Figure. S7. Rapamycin inhibited mTOR activity in GDNPs-acting T cells **a, b, c** Rapamycin (10nM) was added or not added to M2+GDNPs supernatants to incubate splenocytes. Representative histograms and quantification showing the levels of p-4EBP1, p-S6 in CD4<sup>+</sup> and CD8<sup>+</sup> T cells. The results represent three independent experiments as the mean  $\pm$  SEM. Student's t test (b, c) were used to compare results of different experimental groups for statistically significant

difference (\*\* $P < 0.01$ , \*\*\* $P < 0.001$ , \*\*\*\* $P < 0.0001$ ).

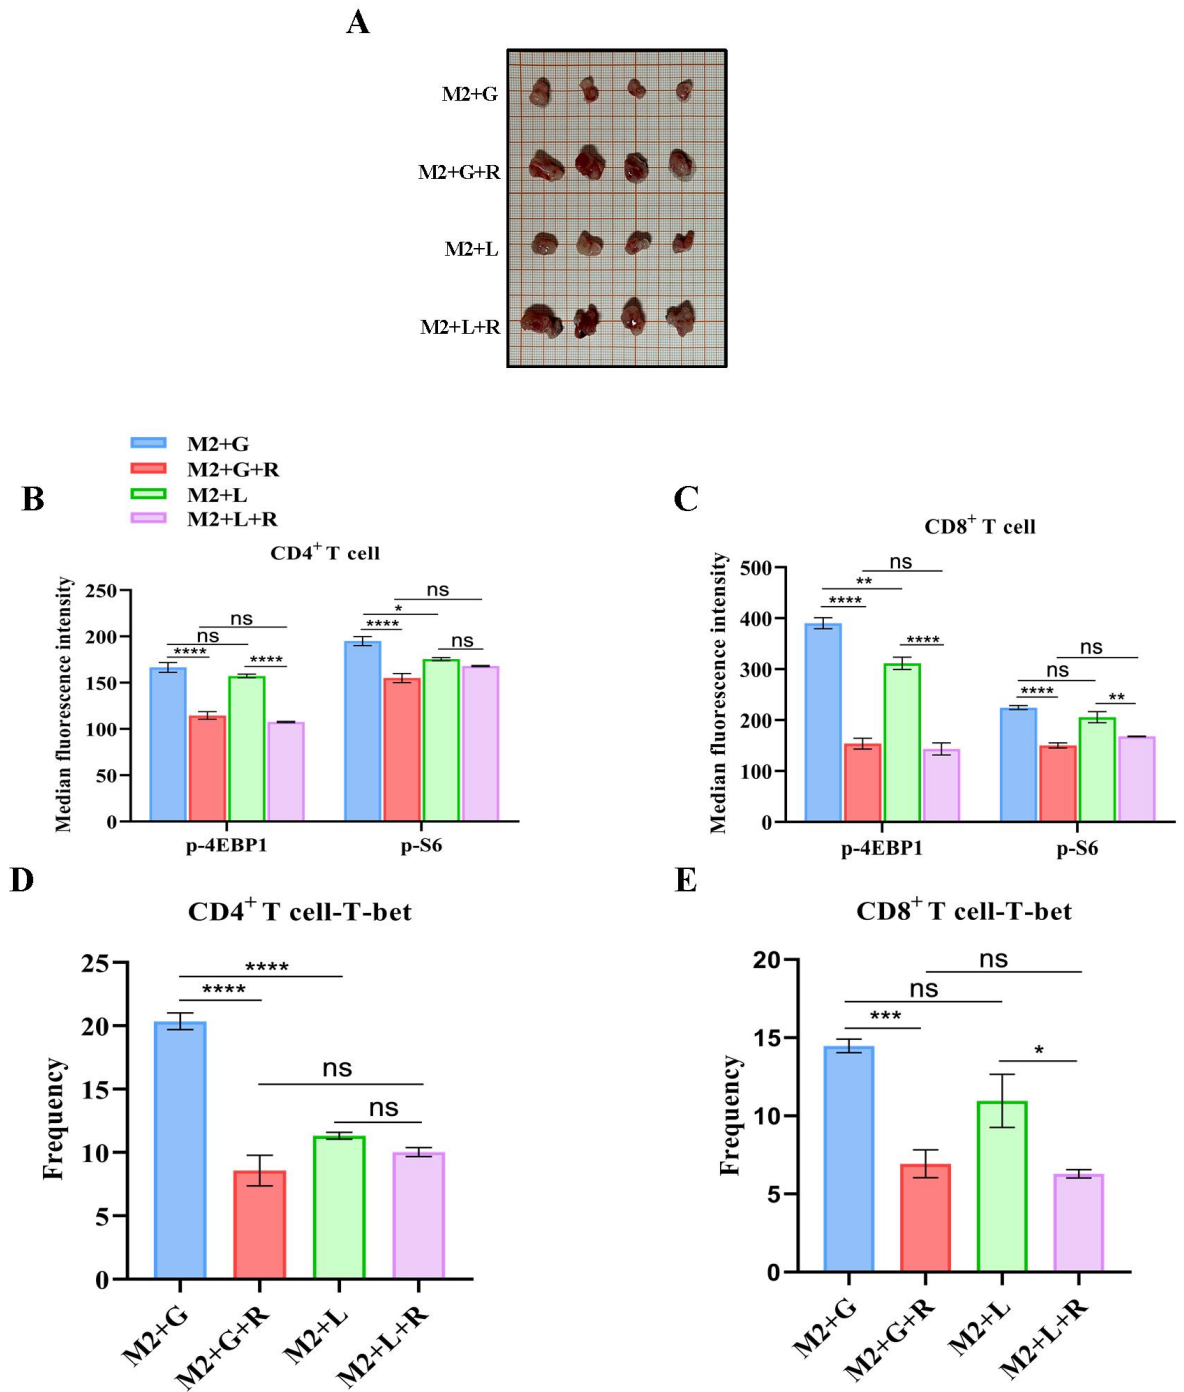

Figure. S8. Inhibition of mTOR activity ineffectively restored the anti-tumor effect of GDNPs. **a** The tumor size of M2+G, M2+G+R, M2+L and M2+L+R four groups was photographed (n=4). **b**, **c** Flow cytometry was used to detect the expression of p-4EBP1 and p-S6 in T cells from four groups. **d**, **e** The transcription factor T- bet in T cells from four groups was detected by flow



cytometry. One-way ANOVA (b, c, d, e) was used to compare results of different experimental groups for statistically significant difference ( $*P < 0.05$ ,  $**P < 0.01$ ,  $***P < 0.001$ ,  $****P < 0.0001$ ).

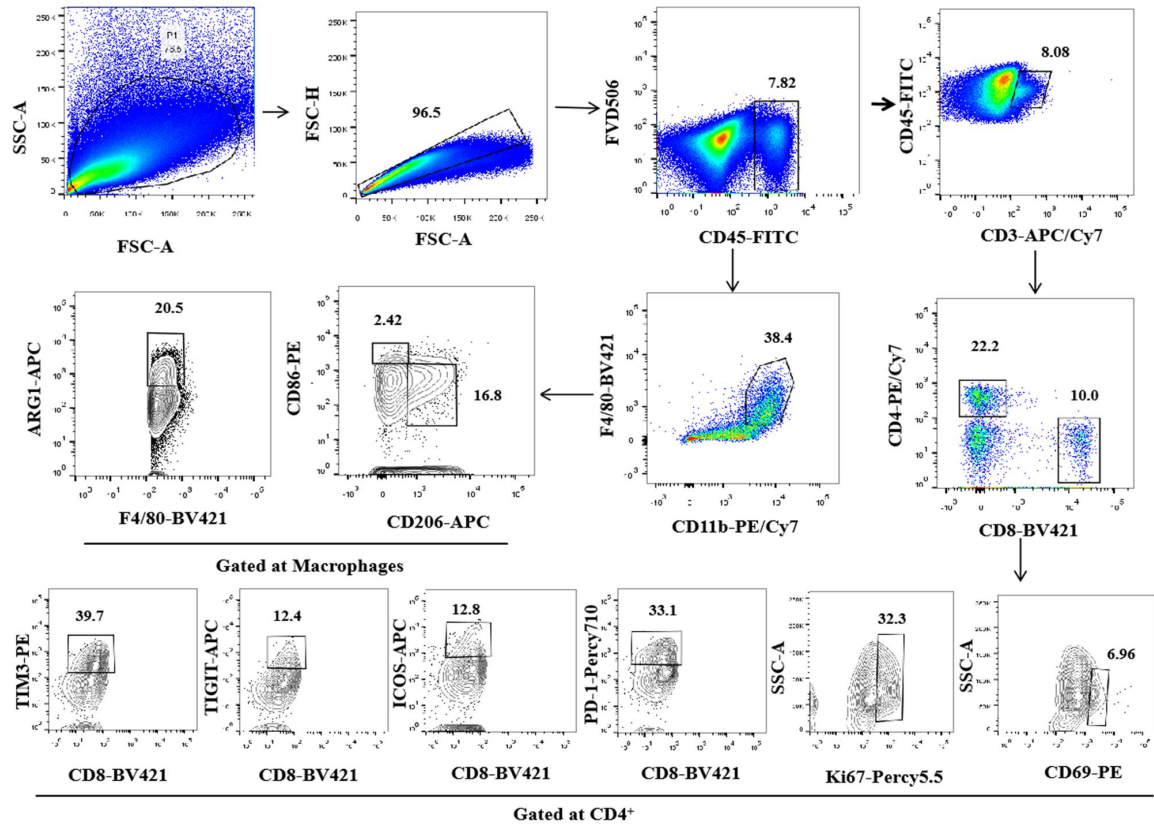

Figure. S9. Representative gating strategies for flow cytometry.

A

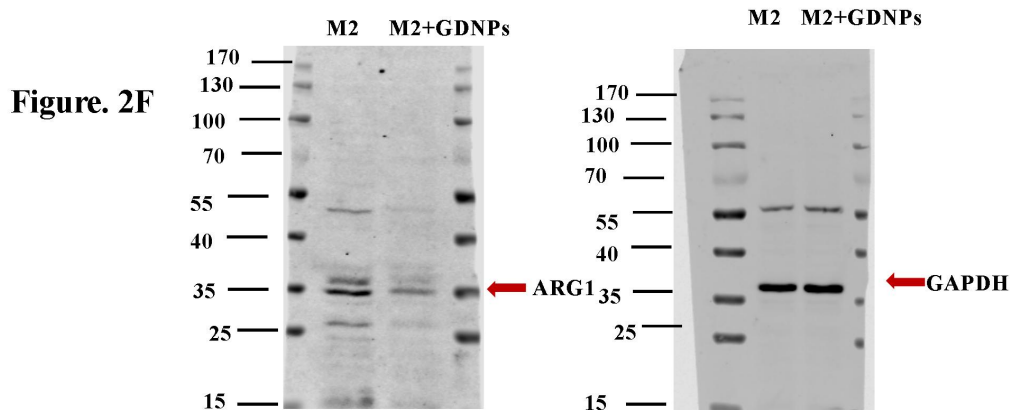

Figure. S10. Unprocessed original images of gels and western blots.
